# Supplementary material for: Identification of Genes in Candida glabrata Conferring Altered Responses to Caspofungin, a Cell Wall Synthesis Inhibitor
Source: PubMed Central journal article supplement (PMC5015946; doi:10.1534/g3.116.032490), 2016-07-21

**Figure S2. Complementation of the *Cg mid1*Δ deletion**

As described in Methods, *Cg MID1* was cloned into a vector containing the Nat resistance genes. The *Cg mid1*Δ strain was transformed with empty vector or vector containing wild type *Cg MID1*. *MID1* complements the caspofungin sensitivity phenotype.

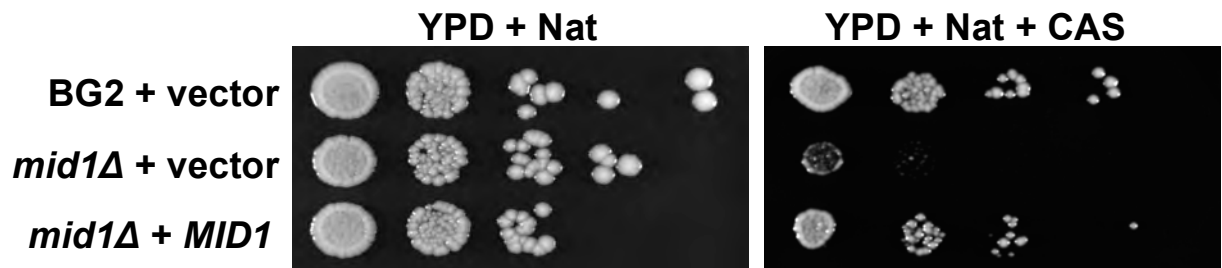

Supplement: supp_g3.116.032490_FigureS2.pdf [file supp_g3.116.032490_FigureS2.pdf]
