# Supplementary material for: Identification of Genes in Candida glabrata Conferring Altered Responses to Caspofungin, a Cell Wall Synthesis Inhibitor
Source: PubMed Central journal article supplement (PMC5015946; doi:10.1534/g3.116.032490), 2016-07-21
Supplement: supp_g3.116.032490_TableS1.pdf [file supp_g3.116.032490_TableS1.pdf]

Table S1. GO terms associated with genes in the selected set

As described in the legend to Figure 1, 64 *C. glabrata* orthologs of *S. cerevisiae* genes identified in the caspofungin screen were submitted to BinGO analysis (**A**) and to FunSpec analysis (**B**; the Biological Process results are shown, run without and with Bonferroni correction). Sixty-three gene names are associated with the GO terms as listed here. x = number of genes from the test set matching that GO term, while n = total number of genes in the genome with that term. p-value is the statistical significance associated with the number of genes in the test set relative to the total number of genes with a given GO term. *TAD1* is not associated with any GO terms and is therefore not represented in the table. Genes that when disrupted cause caspofungin sensitivity are in black; genes that when disrupted cause caspofungin tolerance are in red.

| <b>A. BinGO Analysis</b><br>GO Term Description | GO-ID | X  | N    | p-value  | Genes in test set                                                                                                                                                                                                                               |
|-------------------------------------------------|-------|----|------|----------|-------------------------------------------------------------------------------------------------------------------------------------------------------------------------------------------------------------------------------------------------|
| cell wall organization                          | 71555 | 11 | 254  | 4.04E-05 | <i>BEM2 CNA1 CRR1 ECM7 <b>GAS1</b> LRG1 MNN10 PST1 SLT2 SWI4 VAN1</i>                                                                                                                                                                           |
| signal transduction                             | 7165  | 10 | 259  | 2.44E-04 | <i>BEM2 BFA1 CRZ1 GPR1 <b>KSS1</b> LRG1 MKK1 MSG5 SLT2 SRO7</i>                                                                                                                                                                                 |
| vesicle-mediated transport                      | 16192 | 12 | 370  | 2.82E-04 | <i><b>DNF1</b> FTH1 <b>GEA2</b> <b>GGA2</b> <b>INP53</b> PEP1 <b>PMR1</b> SCD5 SHR3 SLT2 SRO7 STV1</i>                                                                                                                                          |
| Membrane                                        | 16020 | 32 | 1852 | 3.70E-04 | <i><b>ALG6</b> BEM2 BPT1 CCH1 <b>DFG10</b> <b>DNF1</b> ECM7 FTH1 <b>GAS1</b> <b>GEA2</b> <b>GGA2</b> GPR1 GTR2 ITR2 MID1 MNN10 <b>MTC4</b> <b>ORM1</b> PAT1 PDR16 PEP1 <b>PMR1</b> PMT2 PST1 SCD5 SHR3 SLT2 <b>SPO7</b> SRO7 STV1 VAN1 ZRT3</i> |
| Golgi apparatus                                 | 5794  | 9  | 242  | 6.74E-04 | <i><b>GEA2</b> <b>GGA2</b> MNN10 MNN5 PEP1 <b>PMR1</b> STV1 VAN1 <b>YPR089W</b></i>                                                                                                                                                             |
| transporter activity                            | 5215  | 11 | 392  | 1.73E-03 | <i>BPT1 CCH1 <b>DNF1</b> FTH1 ITR2 MID1 PAT1 PDR16 <b>PMR1</b> STV1 ZRT3</i>                                                                                                                                                                    |
| Transport                                       | 6810  | 22 | 1221 | 3.18E-03 | <i>BPT1 CCH1 <b>DNF1</b> FTH1 <b>GEA2</b> <b>GGA2</b> GTR2 <b>INP53</b> ITR2 LRG1 MID1 PAT1 PEP1 <b>PMR1</b> PDR16 SCD5 SHR3 SLT2 SRO7 STV1 YDJ1 ZRT3</i>                                                                                       |

|                                                               |              |          |          |                |                                                                                 |
|---------------------------------------------------------------|--------------|----------|----------|----------------|---------------------------------------------------------------------------------|
| protein modification process                                  | 6464         | 14       | 639      | 4.09E-03       | <i>ALG6 ECM7 KSS1 MKK1 MNN10 MNN5 MSG5 PMT2 RAD5 RTT109 SHR3 SIN3 SLT2 VAN1</i> |
| signal transducer activity                                    | 4871         | 4        | 70       | 5.36E-03       | <i>GPR1 KSS1 PEP1 SLT2</i>                                                      |
| pseudohyphal growth                                           | 7124         | 4        | 73       | 6.22E-03       | <i>DFG10 FKH2 GPR1 KSS1</i>                                                     |
| response to chemical stimulus                                 | 42221        | 10       | 399      | 6.40E-03       | <i>CNA1 GPR1 KSS1 MKK1 MSG5 ORM1 PDR16 SLT2 YKL075C WAR1</i>                    |
|                                                               |              |          |          |                |                                                                                 |
| <b>B. FunSpec Analysis</b>                                    | <b>GO-ID</b> | <b>X</b> | <b>N</b> | <b>p-value</b> | <b>Genes in test set</b>                                                        |
| <b>GO Term Description</b><br>(without Bonferroni correction) |              |          |          |                |                                                                                 |
| Calcium ion transport                                         | 6816         | 4        | 7        | 2.75E-07       | <i>CCH1 ECM7 MID1 PMR1</i>                                                      |
| Calcium ion transmembrane transport                           | 70588        | 2        | 4        | 5.48E-04       | <i>CCH1 MID1</i>                                                                |
| Ion transport                                                 | 6811         | 6        | 107      | 5.50E-04       | <i>CCH1 MID1 PMR1 STV1 ZRT3</i>                                                 |
| Signal transduction                                           | 7165         | 5        | 73       | 6.60E-04       | <i>BEM2 LRG1 MKK1 SLT2</i>                                                      |
| <b>GO Term Description</b><br>(with Bonferroni correction)    | 6816         | 4        | 7        | 1.59E-07       | <i>CCH1 ECM7 MID1 PMR1</i>                                                      |
