# Supplementary material for: Identification of Genes in Candida glabrata Conferring Altered Responses to Caspofungin, a Cell Wall Synthesis Inhibitor
Source: PubMed Central journal article supplement (PMC5015946; doi:10.1534/g3.116.032490), 2016-07-21
Supplement: supp_g3.116.032490_TableS2.pdf [file supp_g3.116.032490_TableS2.pdf]

Table S2. Genes knocked out in the BG14 background

| <i>C. glabrata</i> Locus Tag | <i>S. cerevisiae</i> Homolog | Gene Name   | Description of gene product                                                     |
|------------------------------|------------------------------|-------------|---------------------------------------------------------------------------------|
|                              |                              |             | <i>PKC/Cell Wall Integrity Pathway</i>                                          |
| CAGL0L03520g                 | YJL095W                      | <i>BCK1</i> | Kinase in PKC-MAPK pathway                                                      |
| CAGL0I06512g                 | YER155c                      | <i>BEM2</i> | RhoGAP involved in the control of cytoskeleton organization                     |
| CAGL0J03828g                 | YPL140C                      | <i>MKK1</i> | MAPKK involved in control of cell integrity                                     |
| CAGL0H05621g                 | YPL089C                      | <i>RLM1</i> | MADS-box transcription factor; component of the CWI pathway                     |
| CAGL0G04873g                 | YLR371W                      | <i>ROM2</i> | GEF for Rho1/2                                                                  |
| CAGL0J00539g                 | YHR030c                      | <i>SLT2</i> | Serine/threonine MAP kinase; regulates cell wall integrity                      |
| CAGL0F01507g                 | YOR008C                      | <i>SLG1</i> | Sensor-transducer of the PKC-MAPK pathway                                       |
| CAGL0A04565g                 | YER111c                      | <i>SWI4</i> | DNA binding component of the SBF complex                                        |
|                              |                              |             |                                                                                 |
|                              |                              |             | <i>High Affinity Ca<sup>2+</sup> Influx (HACS)</i>                              |
| CAGL0B02211g                 | YGR217W                      | <i>CCH1</i> | Ca <sup>2+</sup> -permeable cation channel required for Ca <sup>2+</sup> influx |
| CAGL0M00748g                 | YLR443W                      | <i>ECM7</i> | Ca <sup>2+</sup> -permeable cation channel required for Ca <sup>2+</sup> influx |
| CAGL0M03597g                 | YNL291C                      | <i>MID1</i> | Ca <sup>2+</sup> -permeable cation channel required for Ca <sup>2+</sup> influx |
